# Supplementary material
Source: publisher figshare collection journal article supplement (https://acs.figshare.com/ndownloader/files/20081417)
Supplement: Supplementary file 1 [file 20081417]

# Supporting Information

## Alkanethiol Molecular Barriers for Controlling Small Molecule Release Kinetics from a Microgel- Based Reservoir Device

Siyuan Guo, Wildemar Stef  nio Pereira Carvalho, Daniel Wong, Michael J. Serpe\*

Department of Chemistry, University of Alberta, Edmonton, Alberta, T6G 2G2, Canada

\* serpe@ualberta.ca

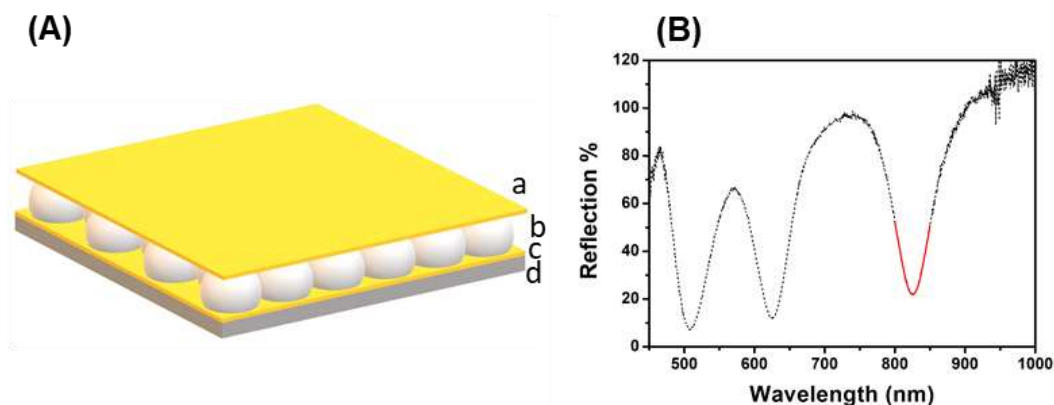

**Figure S1.** (A) Schematic of a pNIPAm-*co*-AAc microgel based etalon; (a) 20 nm of Au layer with 2 nm of Cr adhesion layer, (b) pNIPAm-*co*-AAc microgel monolayer, (c) 15 nm of Au layer with 2 nm of Cr adhesion layer, and (d) glass substrate. (B) Optical reflection spectrum (black dashed curve) of a representative, unmodified etalon. A Gaussian curve was fit (red solid curve) to a portion of the spectrum to identify the wavelength of the trough.

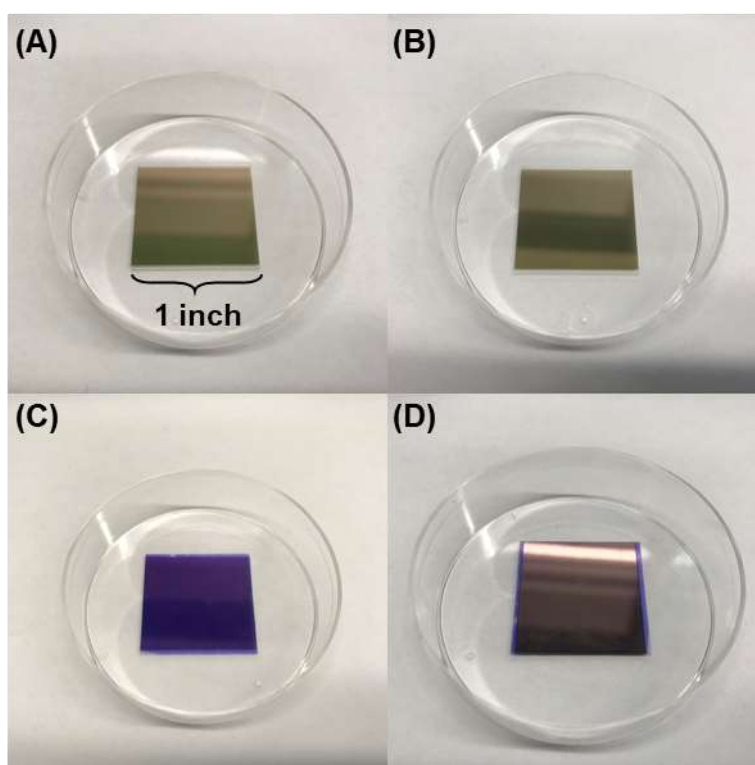

**Figure S2.** (A) 15 nm of Au with 2 nm of Cr adhesion layer deposited on a microscope glass cover slice; (B) metal-coated substrate with a pNIPAm-*co*-AAc microgel layer; (C) CV-loaded pNIPAm-*co*-AAc microgel monolayer on substrate; (D) fabricated CV-loaded etalon device with 20 nm of Au and 2 nm of Cr adhesion layer deposited on top of microgel layer.

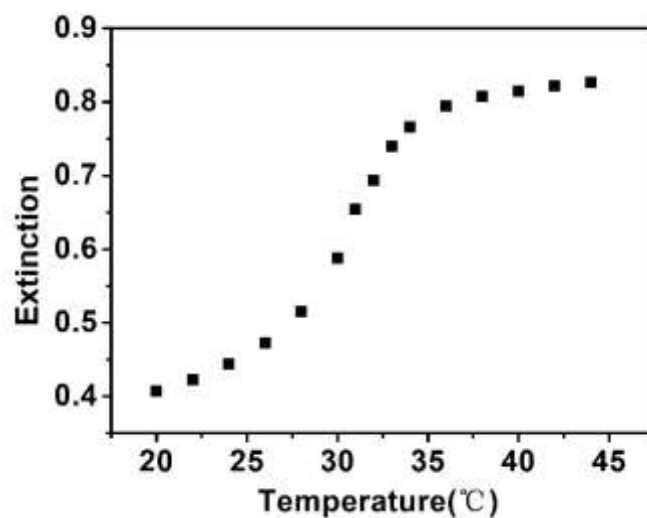

**Figure S3.** A graph of UV-vis extinction (measure from absorbance) at wavelength 240 nm of the pNIPAm-co-AAc microgels as a function of solution temperature. According to these data, the LCST of the microgels is ~31 °C.

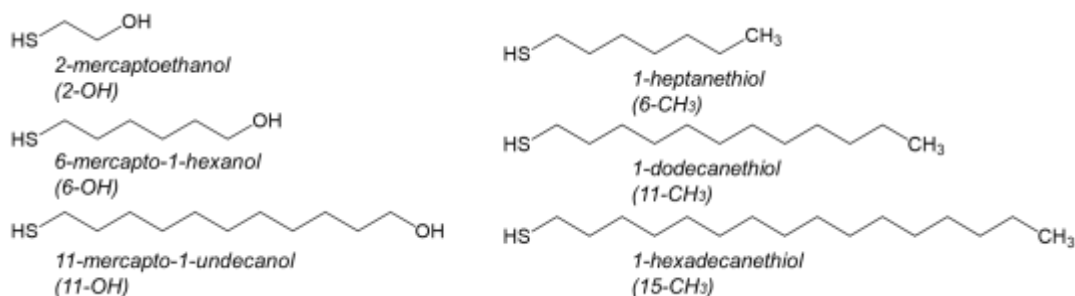

**Figure S4.** Structures, full names, and abbreviations of alkanethiol molecules used in surface modification.

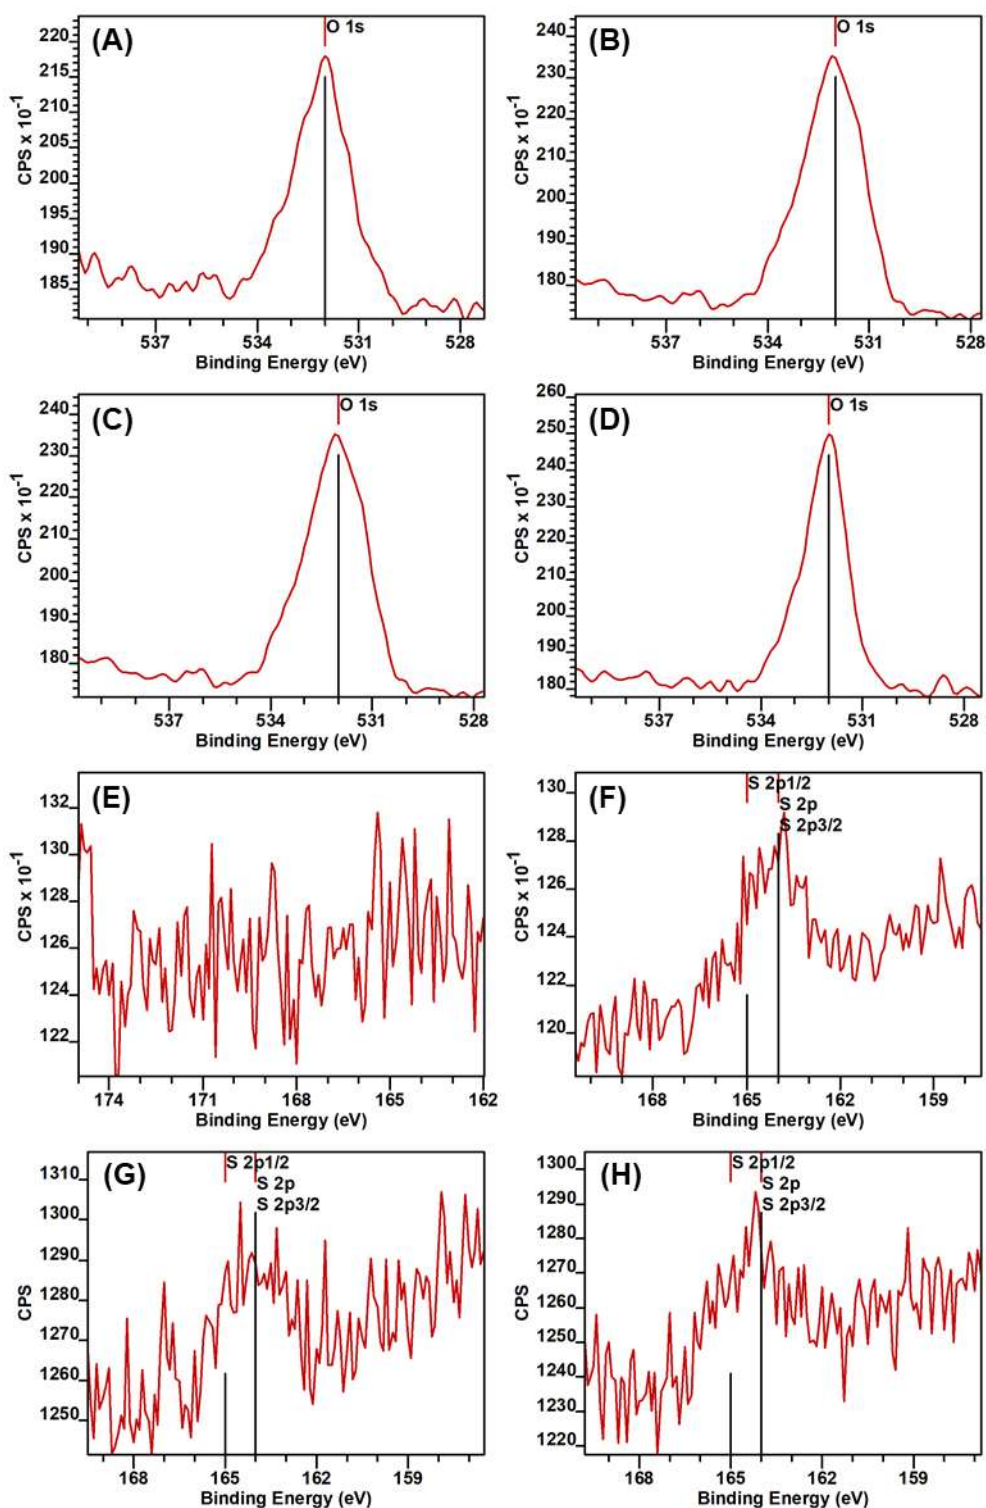

**Figure S5.** High resolution XPS O 1s spectrum of (A) unmodified, (B) 6-OH, (C) 6-CH<sub>3</sub>, (D) 6-O/6-C etalon sample, and high resolution XPS S 2p spectrum of (E) unmodified, (F) 6-OH, (G) 6-CH<sub>3</sub>, (H) 6-O/6-C etalon sample.

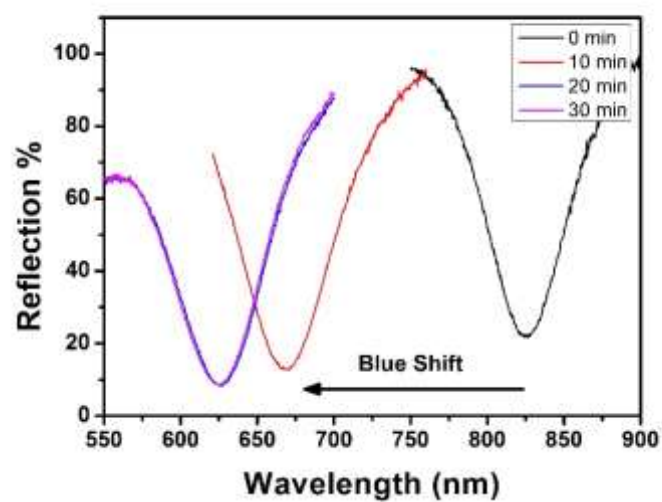

**Figure S6.** Collection of partial reflectance spectrum of an unmodified etalon sample at different times after the solution pH changed from 6.5 to 3.

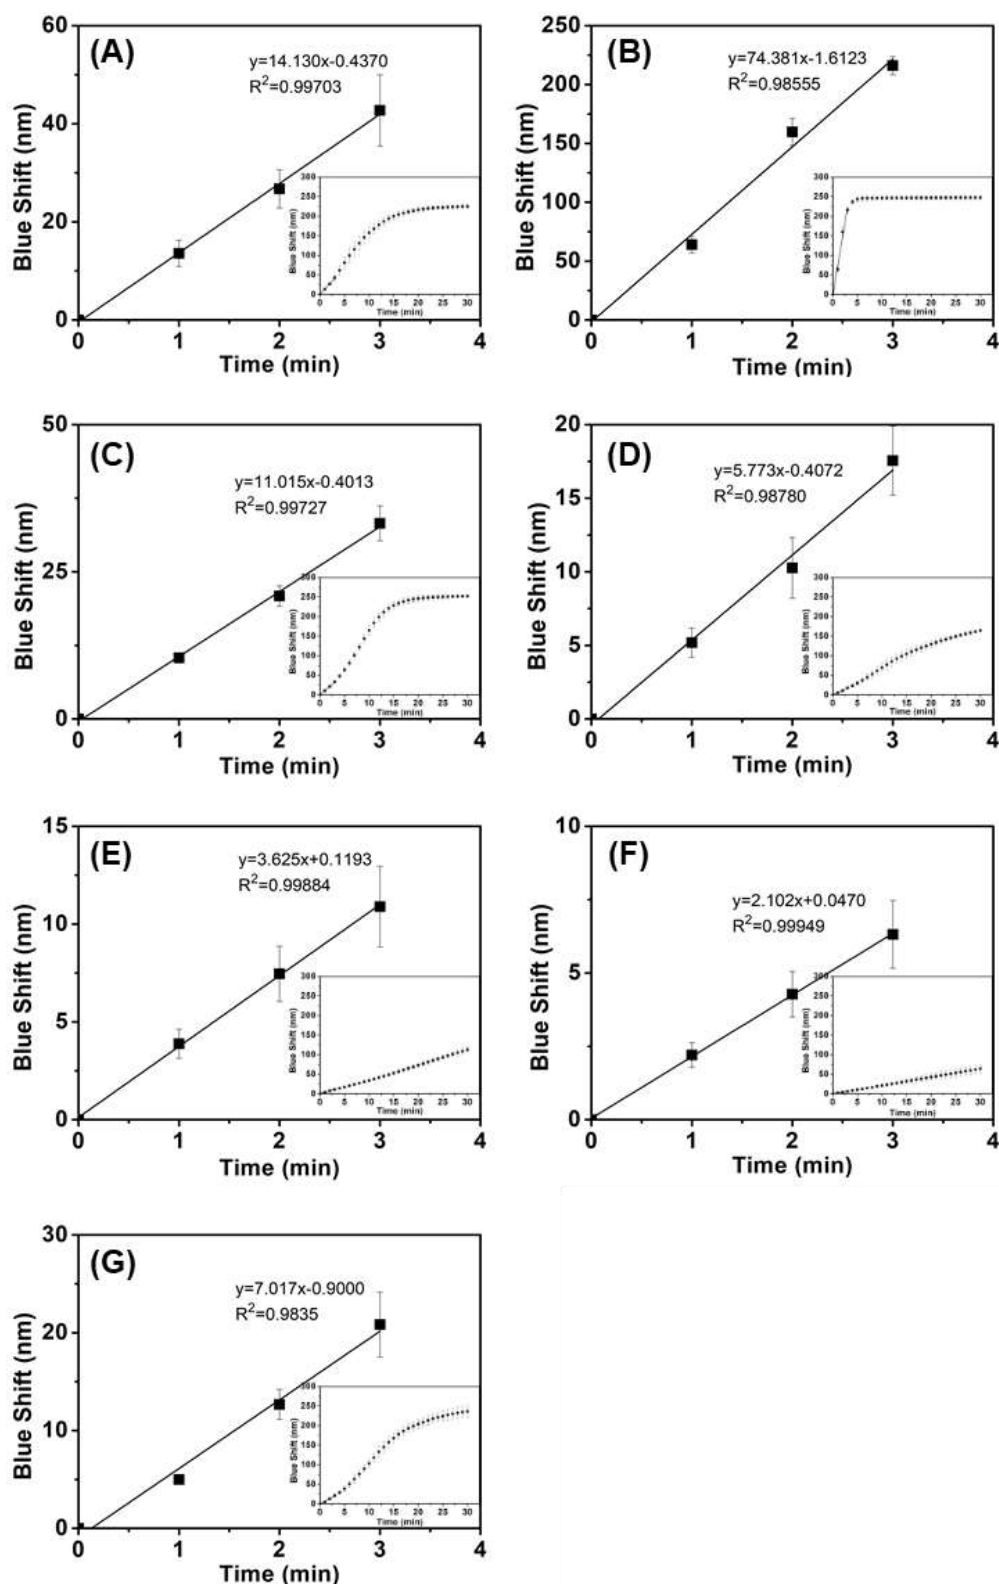

**Figure S7.** Defining initial slope of blue shift kinetics curves of (A) unmodified, (B) 2-OH, (C) 6-OH, (D) 6-CH<sub>3</sub>, (E) 11-CH<sub>3</sub>, (F) 15-CH<sub>3</sub> and (G) 6-O/6-C etalon samples with linear fitting on initial four data points. The subfigure is the full blue shift kinetics curve of each modified sample.

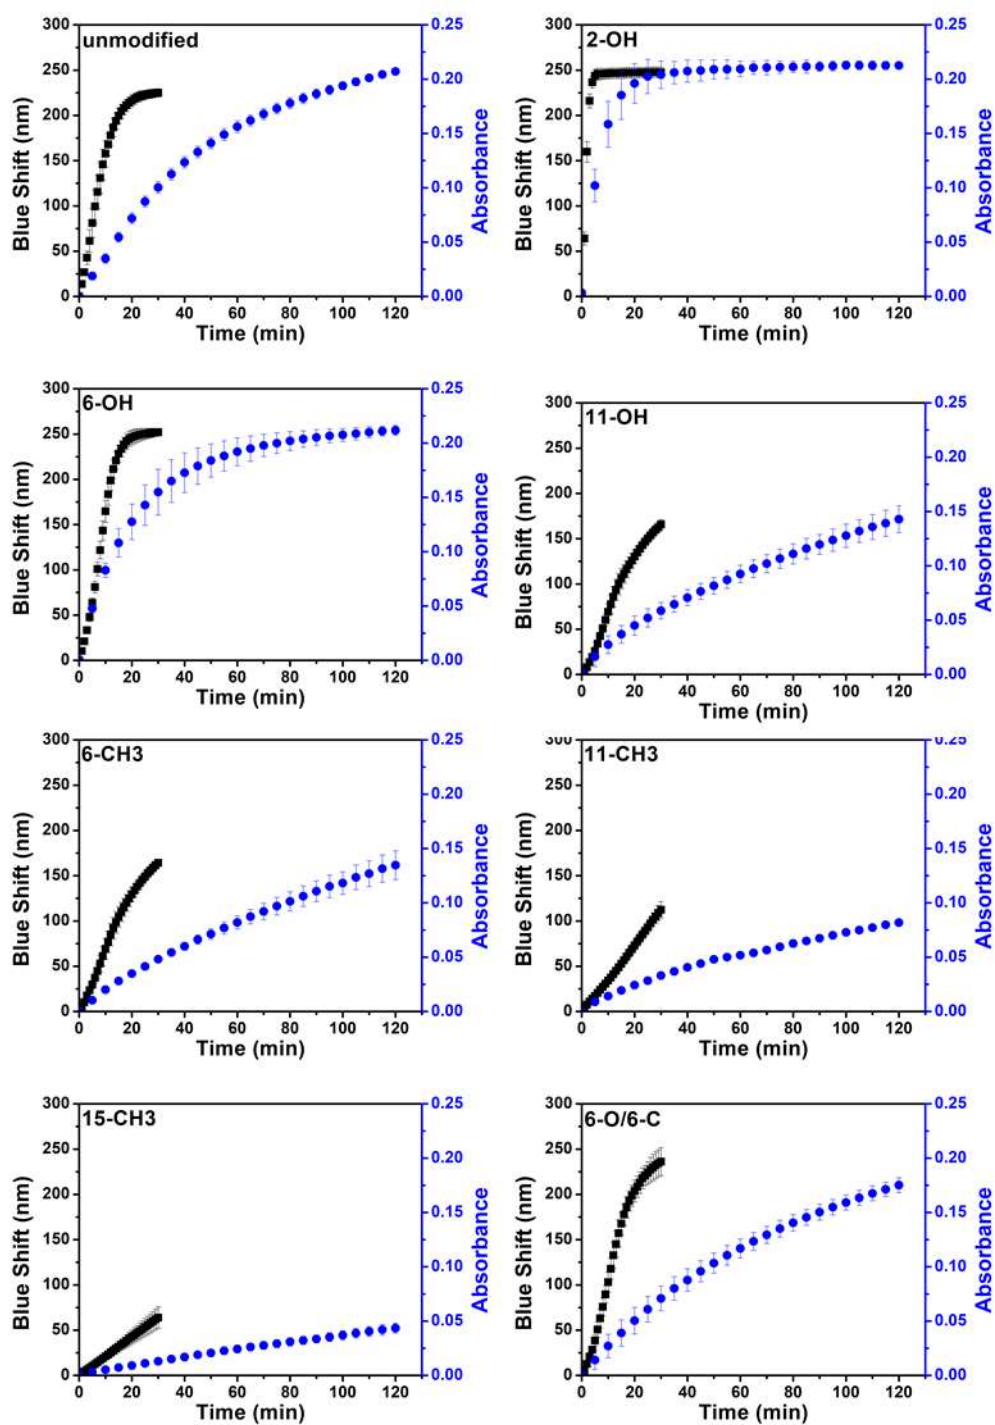

**Figure S8.** Comparison between CV release kinetics and optical reflectance spectrum trough shift kinetics of each kind of modified etalon samples.
